# Supplementary material for: Culturally responsive research ethics: How the socio-ethical norms of Arr-nar/Kreng-jai inform research participation at the Thai-Myanmar border
Source: PubMed Central journal article supplement (PMC10159138; doi:10.1371/journal.pgph.0001875), 2023-05-04
Supplement: pgph.0001875.s003.pdf [file pgph.0001875.s003.pdf]

**For manuscript title:** Culturally responsive research ethics: How the socio-ethical norms of Arr-nar/Kreng-jai inform research participation at the Thai-Myanmar Border

**Consolidated criteria for reporting qualitative studies (COREQ): 32-item checklist**

Developed from:

Tong A, Sainsbury P, Craig J. Consolidated criteria for reporting qualitative research (COREQ): a 32-item checklist for interviews and focus groups. *International Journal for Quality in Health Care*. 2007. Volume 19, Number 6: pp. 349 – 357

| Item no.                                       | Topic                                    | Guide questions/description                                                                                                               | Response and/or location in manuscript (section, page no.)                                                                                                                                                                                           |
|------------------------------------------------|------------------------------------------|-------------------------------------------------------------------------------------------------------------------------------------------|------------------------------------------------------------------------------------------------------------------------------------------------------------------------------------------------------------------------------------------------------|
| <b>Domain 1: Research team and reflexivity</b> |                                          |                                                                                                                                           |                                                                                                                                                                                                                                                      |
| <i>Personal Characteristics</i>                |                                          |                                                                                                                                           |                                                                                                                                                                                                                                                      |
| 1                                              | Interviewer/facilitator                  | Which author/s conducted the interview or focus group?                                                                                    | Interviews and focus group discussions were led by NK, SN, NJ, and MK (Page 8)                                                                                                                                                                       |
| 2                                              | Credentials                              | What were the researcher's credentials? E.g. PhD, MD                                                                                      | Authors with PhD include BH, MP, FN, RM, PYC, and MK. Authors with MD include RM, FN. SA and JR holds an M.Sc. JR is a DPhil candidate.                                                                                                              |
| 3                                              | Occupation                               | What was their occupation at the time of the study?                                                                                       | All authors were researchers at their respective institutions. In addition, BH, FN, RM, MP, PYC, and MK were also professors.                                                                                                                        |
| 4                                              | Gender                                   | Was the researcher male or female?                                                                                                        | Female researchers include NK, SN, BH, NJ, JR, RM, PYC, and MK<br><br>Male researchers include SA, MP, FN                                                                                                                                            |
| 5                                              | Experience and training                  | What experience or training did the researcher have?                                                                                      | All researchers had experiences carrying out qualitative research. NK, SN have deep understandings of the research setting and the cultural context, and were trained to conduct interviews. SA, NJ, JR, MK had training in social science research. |
| <i>Relationship with participants</i>          |                                          |                                                                                                                                           |                                                                                                                                                                                                                                                      |
| 6                                              | Relationship established                 | Was a relationship established prior to study commencement?                                                                               | No.                                                                                                                                                                                                                                                  |
| 7                                              | Participant knowledge of the interviewer | What did the participants know about the researcher? e.g. personal goals, reasons for doing the research                                  | Name, and reasons for carrying out research.                                                                                                                                                                                                         |
| 8                                              | Interviewer characteristics              | What characteristics were reported about the interviewer/facilitator? e.g. Bias, assumptions, reasons and interests in the research topic | Name, and reasons for carrying out research.                                                                                                                                                                                                         |
| <b>Domain 2: study design</b>                  |                                          |                                                                                                                                           |                                                                                                                                                                                                                                                      |
| <i>Theoretical framework</i>                   |                                          |                                                                                                                                           |                                                                                                                                                                                                                                                      |
| 9                                              | Methodological orientation and Theory    | What methodological orientation was stated to                                                                                             | This was an embedded empirical ethics case study, including ethical analysis and                                                                                                                                                                     |

|                              |                              |                                                                                                            |                                                                                                                                                                                                                                                                                                                                                                                 |
|------------------------------|------------------------------|------------------------------------------------------------------------------------------------------------|---------------------------------------------------------------------------------------------------------------------------------------------------------------------------------------------------------------------------------------------------------------------------------------------------------------------------------------------------------------------------------|
|                              |                              | underpin the study? e.g. grounded theory, discourse analysis, ethnography, phenomenology, content analysis | thematic discourse analysis of qualitative data in research ethics in ethnographic context. The analysis was informed by a grounded understanding of the ethical concepts of Arr-nar and Kreng-jai and core concepts of international research ethics. (Section: Data analysis, pages 10 to 13)                                                                                 |
| <i>Participant selection</i> |                              |                                                                                                            |                                                                                                                                                                                                                                                                                                                                                                                 |
| 10                           | Sampling                     | How were participants selected? e.g. purposive, convenience, consecutive, snowball                         | Participants were selected through purposive sampling within a case study design. Some expert stakeholders were identified through snowball recruitment.<br><br>(Section: Study design, recruitment and data collection, page 5-7)                                                                                                                                              |
| 11                           | Method of approach           | How were participants approached? e.g. face-to-face, telephone, mail, email                                | Face-to-face;<br>Telephone;<br>Email invitation                                                                                                                                                                                                                                                                                                                                 |
| 12                           | Sample size                  | How many participants were in the study?                                                                   | 32 in-depth interviews, and 10 focus group discussions (in total 48 persons)<br><br>(Table 2, page 8)                                                                                                                                                                                                                                                                           |
| 13                           | Non-participation            | How many people refused to participate or dropped out? Reasons?                                            | There were no refusals.                                                                                                                                                                                                                                                                                                                                                         |
| <i>Setting</i>               |                              |                                                                                                            |                                                                                                                                                                                                                                                                                                                                                                                 |
| 14                           | Setting of data collection   | Where was the data collected? e.g. home, clinic, workplace                                                 | The data were collected at the SMRU's network of clinics along the Thai-Myanmar border near Mae Sot, Thailand. A few interviews were carried out at participants' preferred location (home or office).<br><br>FGDs were carried out in the conference room at the SMRU's main offices in Mae Sot, Thailand.                                                                     |
| 15                           | Presence of non-participants | Was anyone else present besides the participants and researchers?                                          | Most interviews were held in a private space/room.<br><br>For those few interviews held in a participants' home by request, participant's family member(s) were in nearby room. For some interviews with women, their infant/child was present.<br><br>The focus groups were held in a closed conference room with only participants and facilitators present for the duration. |
| 16                           | Description of sample        | What are the important characteristics of the sample? e.g. demographic data, date                          | Participants included migrant women participating in one of two clinical studies being conducted at SMRU; expert and community stakeholders familiar                                                                                                                                                                                                                            |

|                                        |                                |                                                                               |                                                                                                                                                                                                                                                                           |
|----------------------------------------|--------------------------------|-------------------------------------------------------------------------------|---------------------------------------------------------------------------------------------------------------------------------------------------------------------------------------------------------------------------------------------------------------------------|
|                                        |                                |                                                                               | with the Thai-Myanmar border context; and clinical researchers and clinical staff from SMRU. Participant groups and demographics are described in detail in Tables 1 pages 6-7 and Table 2 page 8.<br><br>Data collection was conducted from December 2017 to March 2019. |
| <i>Data collection</i>                 |                                |                                                                               |                                                                                                                                                                                                                                                                           |
| 17                                     | Interview guide                | Were questions, prompts, guides provided by the authors? Was it pilot tested? | Yes. Included in Supporting Information.<br><br>Yes, we practiced with the guide to check for flow and timing.                                                                                                                                                            |
| 18                                     | Repeat interviews              | Were repeat interviews carried out? If yes, how many?                         | Yes, there were 3 follow-up interviews.                                                                                                                                                                                                                                   |
| 19                                     | Audio/visual recording         | Did the research use audio or visual recording to collect the data?           | Yes, audio recording was used. (Page 9)                                                                                                                                                                                                                                   |
| 20                                     | Field notes                    | Were field notes made during and/or after the interview or focus group?       | During and after.                                                                                                                                                                                                                                                         |
| 21                                     | Duration                       | What was the duration of the interviews or focus group?                       | IDI: 30 minutes to 60 minutes<br>FGD: 45 minutes to 90 minutes                                                                                                                                                                                                            |
| 22                                     | Data saturation                | Was data saturation discussed?                                                | Yes. (Page 8.)                                                                                                                                                                                                                                                            |
| 23                                     | Transcripts returned           | Were transcripts returned to participants for comment and/or correction?      | No, transcripts were not returned.                                                                                                                                                                                                                                        |
| <b>Domain 3: analysis and findings</b> |                                |                                                                               |                                                                                                                                                                                                                                                                           |
| <i>Data analysis</i>                   |                                |                                                                               |                                                                                                                                                                                                                                                                           |
| 24                                     | Number of data coders          | How many data coders coded the data?                                          | Four (NK, SA, SN, and NJ) with periodic discussions with JR, PYC, and MK.<br><br>(Page 10-11.)                                                                                                                                                                            |
| 25                                     | Description of the coding tree | Did authors provide a description of the coding tree?                         | No.                                                                                                                                                                                                                                                                       |
| 26                                     | Derivation of themes           | Were themes identified in advance or derived from the data?                   | Themes were derived from the data.                                                                                                                                                                                                                                        |
| 27                                     | Software                       | What software, if applicable, was used to manage the data?                    | NVivo 12                                                                                                                                                                                                                                                                  |
| 28                                     | Participant checking           | Did participants provide feedback on the findings?                            | We did not perform formal participant checking due to the difficulty of tracing migrant participants. However, de-identified aggregate findings were presented and discussed with a subset of participants prior to publications. These presentations/workshop included   |

|                  |                              |                                                                                                                                 |                                                                                                                                                                                                                                                                                                                                                                                                   |
|------------------|------------------------------|---------------------------------------------------------------------------------------------------------------------------------|---------------------------------------------------------------------------------------------------------------------------------------------------------------------------------------------------------------------------------------------------------------------------------------------------------------------------------------------------------------------------------------------------|
|                  |                              |                                                                                                                                 | participants from the research and staff group, and community stakeholders who serve on the Community Advisory Board.                                                                                                                                                                                                                                                                             |
| <i>Reporting</i> |                              |                                                                                                                                 |                                                                                                                                                                                                                                                                                                                                                                                                   |
| 29               | Quotations presented         | Were participant quotations presented to illustrate the themes/findings? Was each quotation identified? e.g. participant number | Yes. / Yes.<br><br>(Result section, pages 13-26.)                                                                                                                                                                                                                                                                                                                                                 |
| 30               | Data and findings consistent | Was there consistency between the data presented and the findings?                                                              | Yes.                                                                                                                                                                                                                                                                                                                                                                                              |
| 31               | Clarity of major themes      | Were major themes clearly presented in the findings?                                                                            | Yes.                                                                                                                                                                                                                                                                                                                                                                                              |
| 32               | Clarity of minor themes      | Is there a description of diverse cases or discussion of minor themes?                                                          | Yes, we include and describe 'sub-themes' within the broader major ethical themes from the data. We also describe ethical/cultural ambiguity where relevant to appreciating the theme or subtheme in cultural context. We are careful to note when views were expressed did not reflect the majority of participants, but were nonetheless important for appreciating the range of ethical views. |
